# Supplementary material
Source: HighWire-hosted journal article supplement (http://thorax.bmj.com/highwire/filestream/173965/field_highwire_adjunct_files/0/Thorax_Table_141309.docx)
Supplement: Thorax_Table_141309.docx [file Thorax_Table_141309.docx]

Supplementary table 1: Exposure effect stratified by district

|  | Exposed | | | Unexposed | | | p=0.104 |
| --- | --- | --- | --- | --- | --- | --- | --- |
| District | Deaths | 100 PYO | Rate | Deaths | 100 PYO | Rate | HR* |
| Bandim 1  Bandim 2  Belem  Mindara | 14  16  9  2 | 3.23  1.89  2.48  0.91 | 4.3  8.5  3.6  2.2 | 255  137  80  54 | 67.5  36.4  31.2  15.6 | 3.8  3.8  2.5  3.5 | 1.37 (0.8-2.3)  2.70 (1.7-4.2)  1.74 (0.9-3.3)  0.72 (0.2-2.5) |

* Adjusted for clustering within houses p: p-value for district interaction

Overall exposure effect adjusted for house clustering and with stratification using district specific baselines: HR=1.70 (1.3-2.3)
